# Supplementary material
Source: Springer Nature journal article supplement (https://www.springermedizin.de/resource/supplementary/12950_2013_361_MOESM4_ESM.pdf/9557674)

# HEKa nitrite production

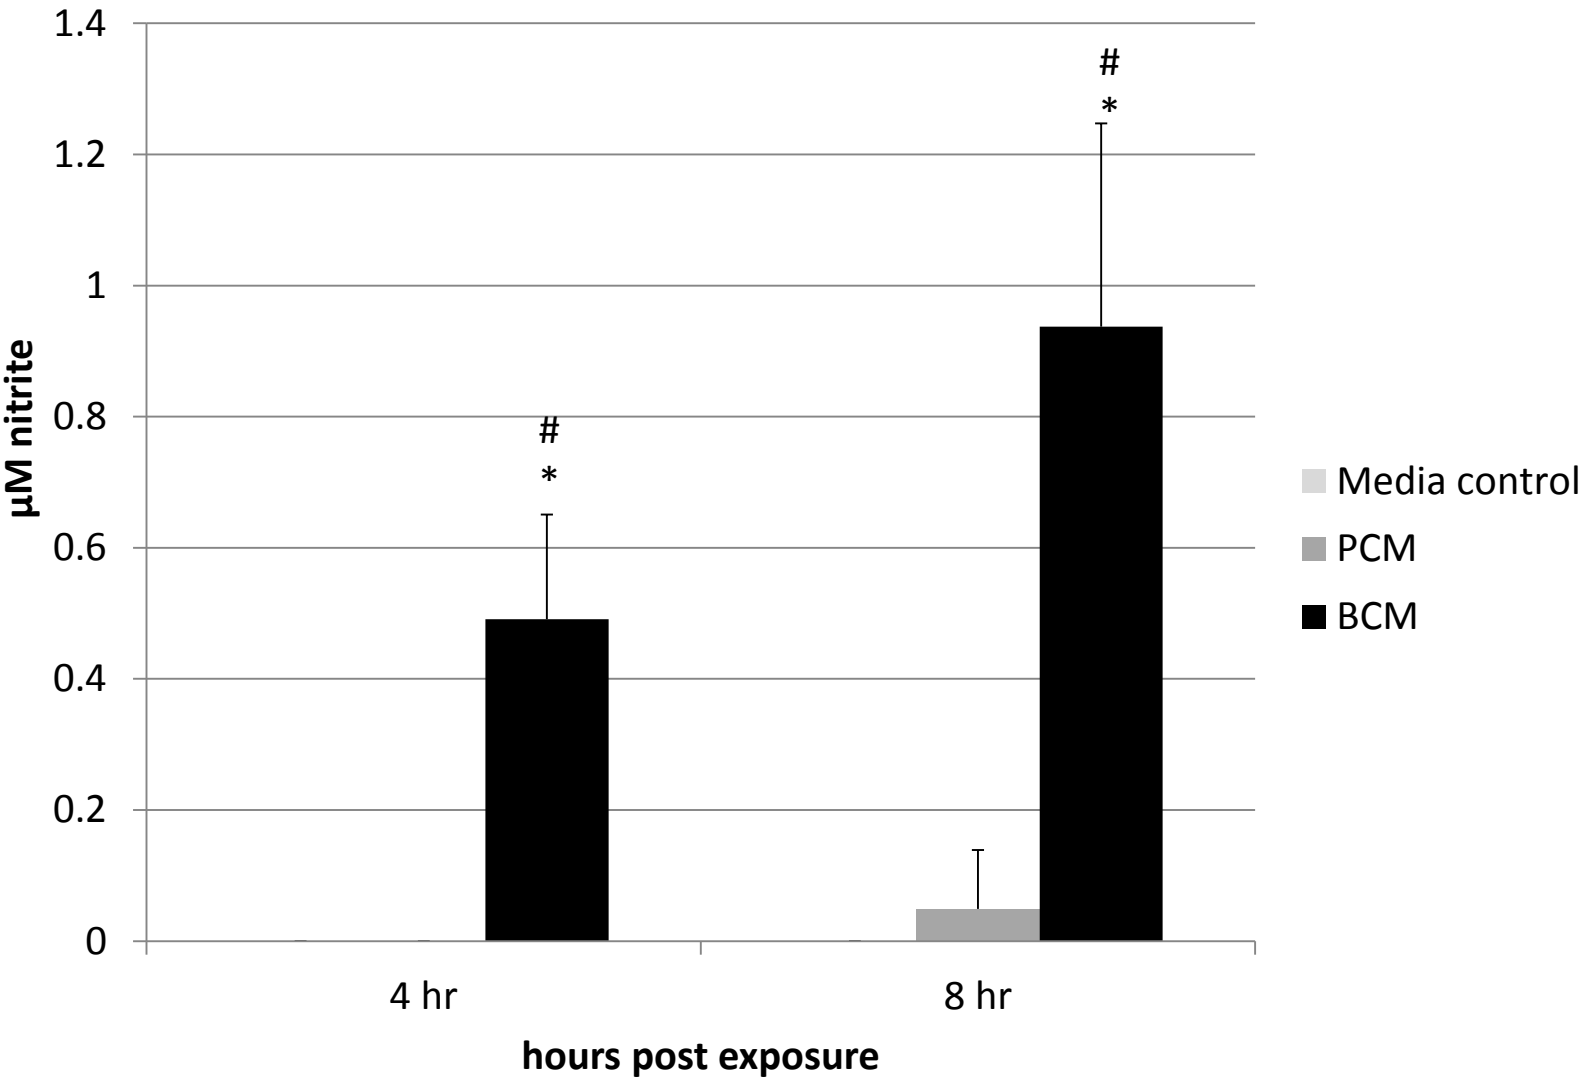

Supplement: MOESM4 [file 9557674]
